# Supplementary material
Source: HighWire-hosted journal article supplement (https://www.cmaj.ca/highwire/filestream/72154/field_highwire_adjunct_files/3/181644-res-4-at.pdf)

**Appendix 4 (as supplied by the authors): Flow diagram of patients enrolled on or after March 1, 2012 who had serial postoperative serum creatinine assessments within 7 days of surgery**

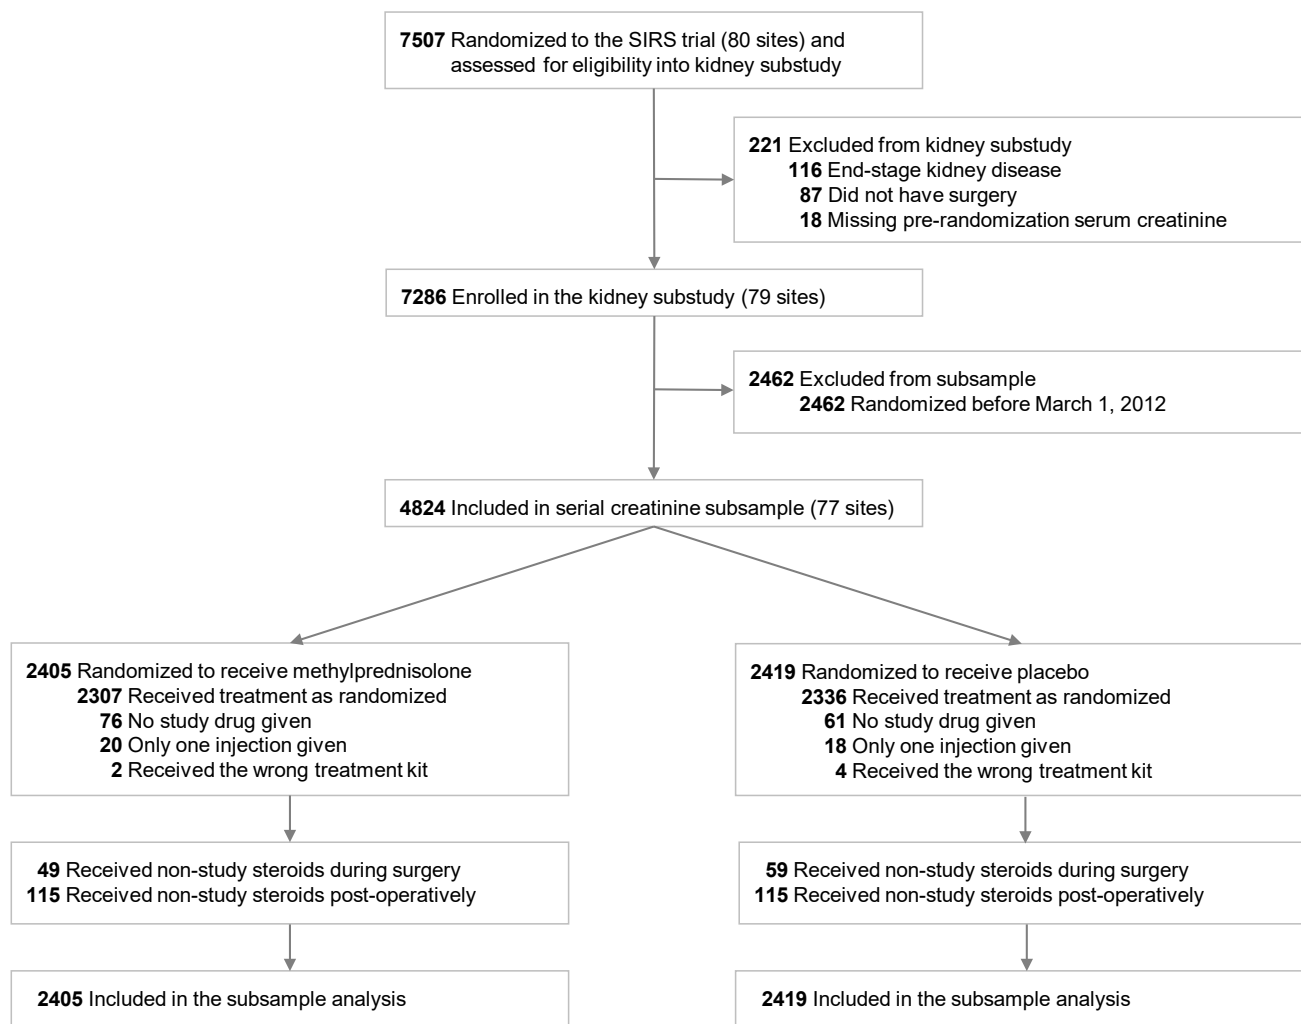

Supplement: 181644-res-4-at.pdf [file 181644-res-4-at.pdf]
